# Supplementary material for: Nutritional Value and In Vitro Volatile Fatty Acid Production of Forage Grasses Cultivated Using Farmyard Manure and Desmodium intortum Intercropping in the Upper Blue Nile Basin, Ethiopia
Source: Hindawi journal article supplement (doi:10.1155/2022/6593230), 2022-08-25
Supplement: f1 [file 6593230.f1.docx]

# Supplementary data

**Title:** Nutritional value and in vitrovolatile fatty acid production of forage grasses cultivated using farmyard manure and *Desmodium* intercropping in the upper Blue Nile basin, Ethiopia

**Journal:** Advances in Agriculture

**Table S1.** Effects of fertilizer treatment on in vitro organic matter digestibility and volatile fatty acid production at Aba Gerima under different fertilizer treatments

- We have included this to support the main and interaction effects between forage grasses, fertilizer treatments and year on gas production, in vitro organic matter digestibility and metabolizable energy. The result showed that *Desmodium* plus FYM and desho in 2019 production season was highly significant compared to 2018 in the same treatment combination for GP24 and IVOMD. Conversely, *Desmodium* plus FYM and Napier indicated lower GP24 and IVOMD but higher metabolizable energy in 2018 production year.

**Table S2.** Effects of fertilizer treatments on in vitro organic matter digestibility and volatile fatty acid production at Guder

- Table S2. Supports main and interaction effects of *Desmodium* plus FYM and desho in 2019 production season showed higher GP24, IVOMD, and ME at Guder watershed. This showed that irrespective of agro-ecologies *Desmodium* plus FYM and desho in 2019 production season was better in GP24 and IVOMD, which is an important parameter for livestock production. In addition, from our result we can say that within the same treatment interaction and agro-ecologies second production season was better in in vitro digestibility. This may be associated with as forage grasses are perennial, it may reach for harvest within shorter time interval with relatively lower acid detergent lignin constitutes in the second year, which may improve digestibility of forage grasses.

**Table S3 and S4.** Relative value on chemical composition under various fertilizer treatments at Aba Gerima and Guder watersheds

- In the two tables percent increment or decrease in chemical composition of forage grasses under various fertilizer treatments compared to forage grass alone at Aba Gerima and Guder watersheds.

**Table S5 and S6.** Relative value on in vitro gas and volatile fatty acid production of forage grasses under various fertilizer treatments at Aba Gerima and Guder watersheds.

- In the two tables percent increase or decrease in vitro gas and volatile fatty acid production of forage grasses under various fertilizer treatments compared to the control in the two watersheds. The relative change indicates percent value increment or decrement in in vitro gas production, IVOMD, ME and volatile fatty acid production of forage grasses.

Table S1. Effects of fertilizer treatment on in vitro organic matter digestibility and volatile fatty acid production at Aba Gerima

| Variables | GP24  ml/0.2g DM | IVOMD  % | ME  MJ/kg DM | VFAs and methane production (mmol/L) | | | | | | |
| --- | --- | --- | --- | --- | --- | --- | --- | --- | --- | --- |
| Acetate | Propionate | Butyrate | Valerate | TVFA | A:P | CH4 |
| ***Fertilizer treatment (F)*** | | | | | | | | | | |
| Control | 31.9c | 52.6c | 7.3b | 53.6c | 27.5c | 6.3b | 3.0a | 90.3b | 2.0b | 20.5b |
| Desm | 32.9bc | 53.2bc | 7.4b | 40.6d | 22.2d | 3.6c | 0.00b | 66.3c | 1.9c | 14.2c |
| FYM | 33.6b | 53.8b | 7.3b | 59.6a | 32.4a | 8.5a | 3.2a | 103.6a | 1.9c | 23.1a |
| Desm & FYM | 35.5a | 55.7a | 7.7a | 58.3b | 28.9b | 7.7ab | 4.2a | 99.1a | 2.1a | 23.3a |
| ± SEM | 0.28 | 0.28 | 0.04 | 0.28 | 0.29 | 0.42 | 0.74 | 1.53 | 0.01 | 0.40 |
| ***Forage grass (FS)*** | | | | | | | | | | |
| Desho grass | 38.7a | 58.1a | 8.1a | 58.0a | 32.2a | 7.5a | 3.5a | 101.2a | 1.9b | 22.0a |
| Napier grass | 28.2b | 49.5b | 6.8b | 48.1b | 23.3b | 5.5b | 1.7b | 78.5b | 2.2a | 18.5b |
| ± SEM | 0.20 | 0.20 | 0.03 | 0.20 | 0.20 | 0.30 | 0.52 | 1.03 | 0.01 | 0.29 |
| ***Year (Y)*** | | | | | | | | | | |
| 2018 | 28.1b | 48.9b | 6.8b | 51.2b | 28.0 | 6.4 | 2.6 | 88.1b | 1.9b | 16.4b |
| 2019 | 38.8a | 58.7a | 8.1a | 54.9a | 27.5 | 6.6 | 2.6 | 91.6a | 2.0a | 24.1a |
| ± SEM | 0.20 | 0.20 | 0.03 | 0.20 | 0.20 | 0.30 | 0.52 | 1.08 | 0.01 | 0.29 |
| Overall mean | 33.5 | 53.8 | 7.4 | 53.0 | 27.7 | 6.5 | 2.6 | 89.8 | 2.0 | 20.3 |
| ***P-values*** | | | | | | | | | | |
| F | < 0.0001 | < 0.0001 | < 0.0001 | < 0.0001 | < 0.0001 | < 0.0001 | 0.0020 | < 0.0001 | < 0.0001 | < 0.0001 |
| FS | < 0.0001 | < 0.0001 | < 0.0001 | < 0.0001 | < 0.0001 | < 0.0001 | 0.0157 | < 0.0001 | < 0.0001 | < 0.0001 |
| Y | < 0.0001 | < 0.0001 | < 0.0001 | < 0.0001 | 0.0929 | 0.5532 | 0.9224 | 0.0298 | < 0.0001 | < 0.0001 |
| F*FS | 0.0003 | 0.0051 | 0.0001 | < 0.0001 | < 0.0001 | 0.0009 | 0.2434 | < 0.0001 | < 0.0001 | < 0.0001 |
| F*Y | < 0.0001 | < 0.0001 | < 0.0001 | 0.0010 | 0.0450 | 0.9864 | 0.9999 | 0.6375 | < 0.0001 | 0.0007 |
| FS*Y | < 0.0001 | < 0.0001 | < 0.0001 | 0.2783 | 0.0929 | 0.9467 | 0.9755 | 0.5792 | < 0.0001 | 0.1125 |
| F*FS*Y | 0.0015 | 0.0134 | 0.0196 | 0.9867 | 0.0450 | 1.0000 | 1.0000 | 0.9388 | < 0.0001 | 0.4750 |

Means with different superscripts in a column are significantly different (*P* < 0.05, Tukey’s test).

Table S2. Effects of fertilizer treatments on in vitro organic matter digestibility and volatile fatty acid production at Guder

| Variables | GP24  ml/0.2g DM | IVOMD  % | ME  MJ/kg DM | VFAs and methane production (mmol/L) | | | | | | |
| --- | --- | --- | --- | --- | --- | --- | --- | --- | --- | --- |
| Acetate | Propionate | Butyrate | Valerate | TVFA | A:P | CH4 |
| ***Fertilizer treatment (F)*** | | | | | | | | | | |
| Control | 30.9d | 53.1d | 7.5c | 44.8c | 24.3c | 4.1 | 1.2 | 74.4b | 1.9a | 16.0ab |
| Desm | 32.5c | 54.7c | 7.4d | 45.9b | 24.9bc | 4.3 | 1.3 | 76.3b | 1.8b | 17.1a |
| FYM | 35.6b | 57.7b | 7.9b | 44.9bc | 25.7b | 3.8 | 1.1 | 75.4b | 1.8b | 15.5c |
| Desm & FYM | 38.1a | 60.1a | 8.2a | 48.6a | 27.0a | 3.9 | 1.7 | 81.3a | 1.9a | 16.3ab |
| ± SEM | 0.28 | 0.29 | 0.04 | 0.28 | 0.29 | 0.37 | 0.17 | 1.06 | 0.01 | 0.31 |
| ***Forage grass (FS)*** | | | | | | | | | | |
| Desho grass | 39.0a | 59.9a | 8.1a | 45.5b | 26.1a | 3.8 | 1.4 | 76.8 | 1.8b | 15.7b |
| Napier grass | 29.5b | 52.9b | 7.4b | 46.5a | 24.9b | 4.3 | 1.2 | 76.9 | 1.9a | 16.7a |
| ± SEM | 0.20 | 0.21 | 0.03 | 0.20 | 0.20 | 0.26 | 0.12 | 0.75 | 0.01 | 0.22 |
| ***Year (Y)*** | | | | | | | | | | |
| 2018 | 31.5b | 53.8b | 7.4b | 44.5b | 25.5 | 3.9 | 1.3 | 75.2b | 1.9 | 13.5b |
| 2019 | 37.0a | 59.0a | 8.0a | 47.6a | 25.5 | 4.1 | 1.3 | 78.5a | 1.9 | 18.9a |
| ± SEM | 0.20 | 0.21 | 0.03 | 0.20 | 0.20 | 0.26 | 0.12 | 0.75 | 0.01 | 0.22 |
| Overall mean | 34.3 | 56.4 | 7.7 | 46.0 | 25.5 | 4.0 | 1.3 | 76.8 | 1.9 | 16.2 |
| ***P-values*** | | | | | | | | | | |
| F | < 0.0001 | < 0.0001 | < 0.0001 | < 0.0001 | < 0.0001 | 0.7564 | 0.1152 | 0.0003 | < 0.0001 | 0.0078 |
| FS | < 0.0001 | < 0.0001 | < 0.0001 | 0.0010 | 0.0002 | 0.1837 | 0.2622 | 0.9305 | < 0.0001 | 0.0026 |
| Y | < 0.0001 | < 0.0001 | < 0.0001 | < 0.0001 | 1.0000 | 0.7099 | 0.8609 | 0.0042 | 1.0000 | < 0.0001 |
| F*FS | < 0.0001 | < 0.0001 | < 0.0001 | < 0.0001 | < 0.0001 | 0.5889 | 0.0097 | < 0.0001 | < 0.0001 | 0.0197 |
| F*Y | < 0.0001 | < 0.0001 | < 0.0001 | 0.1228 | 1.0000 | 0.9990 | 0.9997 | 0.9108 | 1.0000 | 0.9443 |
| FS*Y | < 0.0001 | < 0.0001 | < 0.0001 | 0.9819 | 1.0000 | 1.0000 | 0.9999 | 0.9994 | 1.0000 | 0.9423 |
| F*FS*Y | < 0.0001 | < 0.0001 | < 0.0001 | < 0.0001 | < 0.0001 | 0.7564 | 0.1152 | 0.0003 | < 0.0001 | 0.0078 |

Means with different superscripts in a column are significantly different (*P* < 0.05, Tukey’s test). Control, no fertilizer treatment.

Abbreviations: A:P, acetate to propionate ratio; CH4, methane; Desm, *Desmodium intortum*; DM, dry matter; FYM, farmyard manure; GP24, 24-h gas production; IVOMD, in vitro organic matter digestibility; ME, metabolizable energy; TVFA: total volatile fatty acids.

Table S3. Relative value on chemical composition under various fertilizer treatments at Aba Gerima

| Treatments | Percent increase or decrease | | | | | | |
| --- | --- | --- | --- | --- | --- | --- | --- |
| Ash | NDF | ADF | ADL | EE | CP | GE |
| Napier alone | 0.00 | 0.00 | 0.00 | 0.00 | 0.00 | 0.00 | 0.00 |
| Napier+FYM | -1.58 | 6.47 | 4.43 | -5.55 | 14.36 | -5.73 | 3.71 |
| Napier+Desm | 0.69 | 3.98 | -4.93 | -12.99 | 5.95 | -11.33 | 4.82 |
| Napier+Desm+FYM | -1.56 | 6.54 | 8.40 | 2.87 | 17.87 | -0.06 | 0.22 |
| Desho alone | 0.00 | 0.00 | 0.00 | 0.00 | 0.00 | 0.00 | 0.00 |
| Desho +FYM | 0.20 | -6.00 | 9.64 | 6.85 | -8.16 | -12.43 | -4.62 |
| Desho +Desm | 4.92 | -4.90 | 2.60 | -6.15 | -24.10 | -4.36 | -1.26 |
| Desho +Desm+FYM | 1.61 | -3.92 | 8.23 | 5.96 | 2.80 | -12.42 | -0.48 |

Table S4. Relative value on chemical composition under various fertilizer treatments at Guder

| Treatments | Percent increase or decrease | | | | | | |
| --- | --- | --- | --- | --- | --- | --- | --- |
| Ash | NDF | ADF | ADL | EE | CP | GE |
| Napier alone | 0.00 | 0.00 | 0.00 | 0.00 | 0.00 | 0.00 | 0.00 |
| Napier+FYM | 2.14 | -0.01 | -5.12 | 4.03 | 5.27 | 2.55 | 0.19 |
| Napier+Desm | -0.66 | -3.72 | -12.45 | 0.47 | -2.38 | -5.10 | -3.35 |
| Napier+Desm+FYM | -0.37 | -7.41 | -6.62 | 3.92 | 7.53 | 1.43 | -3.18 |
| Desho alone | 0.00 | 0.00 | 0.00 | 0.00 | 0.00 | 0.00 | 0.00 |
| Desho +FYM | -3.02 | -5.55 | -9.99 | -5.45 | 25.75 | 4.91 | -1.49 |
| Desho +Desm | 2.62 | -0.44 | -7.43 | -8.80 | 6.80 | -8.11 | -1.02 |
| Desho +Desm+FYM | -1.17 | -2.24 | -12.13 | -11.14 | 25.75 | 5.18 | 0.25 |

ADF: acid detergent fiber; ADL: acid detergent lignin; CP: crude protein; Desm: *Desmodium intortum*; EE: ether extract; FYM: farmyard manure; GE: gross energy.

Table S5. Relative value on in vitro gas and volatile fatty acid production of forage grasses under various fertilizer treatments at Aba Gerima

| Treatments | Percent increase or decrease | | | | | | | | | |
| --- | --- | --- | --- | --- | --- | --- | --- | --- | --- | --- |
| GP | IVOMD | ME | Acetate | Propionate | Butyrate | valerate | TVFA | A:P | CH4 |
| Napier alone | 0.01 | 0.00 | 0.04 | 0.01 | -0.02 | -0.13 | -0.29 | 0.00 | -0.20 | -0.02 |
| Napier+FYM | 3.52 | 1.24 | 0.59 | 20.32 | 30.76 | 55.31 | -0.29 | 26.42 | -14.72 | 22.83 |
| Napier+Desm | 11.33 | 5.09 | 4.77 | -21.41 | -10.87 | -10.33 | 0.00 | -19.65 | -10.80 | -25.77 |
| Napier+Desm+FYM | 12.37 | 6.65 | 5.52 | 20.11 | 15.27 | 49.38 | 66.54 | 23.09 | 6.03 | 27.62 |
| Desho alone | 0.00 | 0.00 | 0.03 | 0.00 | -0.01 | 0.03 | -0.11 | 0.00 | 0.15 | -0.01 |
| Desho +FYM | 2.86 | 0.99 | 0.41 | 1.10 | 1.75 | 0.15 | 6.44 | 1.47 | 1.01 | 1.09 |
| Desho +Desm | 0.11 | -0.23 | -1.64 | -40.62 | -33.22 | -52.23 | 0.00 | -48.95 | -5.40 | -61.29 |
| Desho +Desm+FYM | 8.58 | 4.67 | 4.52 | -2.77 | -2.60 | -7.69 | -0.34 | -2.98 | 1.51 | -3.37 |

Table S6. Relative value on in vitro gas and volatile fatty acid production of forage grasses under various fertilizer treatments at Guder

| Treatments | Percent increase or decrease | | | | | | | | | |
| --- | --- | --- | --- | --- | --- | --- | --- | --- | --- | --- |
| GP | IVOMD | ME | Acetate | Propionate | Butyrate | valerate | TVFA | A:P | CH4 |
| Napier alone | 0.00 | 0.00 | 0.00 | 0.00 | 0.00 | 0.00 | 0.00 | 0.00 | 0.00 | 0.00 |
| Napier+FYM | 16.98 | 9.25 | 8.42 | 1.43 | 10.12 | -2.35 | 3.58 | 4.17 | -7.96 | -2.72 |
| Napier+Desm | 6.07 | 2.34 | 2.65 | -4.34 | -5.47 | -13.22 | -12.72 | -5.29 | 2.64 | -4.86 |
| Napier+Desm+FYM | 24.67 | 13.74 | 13.31 | 8.68 | 14.97 | 13.11 | 19.73 | 11.20 | -7.37 | 6.70 |
| Desho alone | 0.00 | 0.00 | 0.00 | 0.00 | 0.00 | 0.00 | 0.00 | 0.00 | 0.00 | 0.00 |
| Desho +FYM | 2.57 | 1.66 | 0.61 | -1.33 | 1.01 | -12.92 | -37.61 | -1.53 | -1.05 | -4.10 |
| Desho +Desm | -13.78 | -7.76 | -7.40 | 8.56 | 8.80 | 3.84 | 43.75 | 9.40 | 1.03 | 8.86 |
| Desho +Desm+FYM | 6.67 | 4.57 | 3.28 | 6.73 | 5.38 | -3.12 | -8.70 | 5.57 | 1.17 | 5.86 |

Means with different superscripts in a column are significantly different at (*P* < 0.05, Tukey’s test). Control, no fertilizer used.

Abbreviations: A:P, acetate to propionate ratio; CH4, methane; Desm, *Desmodium intortum*; FYM, farmyard manure; GP, 24-h gas production; IVOMD, in vitro organic matter digestibility; ME, metabolizable energy; TVFA: total volatile fatty acids.
